# Supplementary material
Source: MDPI journal article supplement (https://www.mdpi.com/2073-4344/13/9/1261)
Supplement: s1 [file s1]

# Supplementary Materials

## **Cyanogel-Based Preparation of Amorphous NiFe Nanoaggregates with Enhanced Activity and Stability for OER**

Shun Li<sup>†,1</sup>, Jinxin Wan<sup>†,1</sup>, Zhenyuan Liu<sup>1,\*</sup>, Mengdie Zhuang<sup>1</sup>, Pengyuan Ren<sup>2,\*</sup>, Weilong Shi<sup>1</sup>, Xiaojun Zeng<sup>3</sup>, Jun Yang<sup>1,\*</sup>

<sup>1</sup> School of Materials Science and Engineering, Jiangsu University of Science and Technology, Zhenjiang 212100, China

<sup>2</sup> School of Civil Engineering and Architecture, Jiangsu University of Science and Technology, Zhenjiang 212100, China

<sup>3</sup> School of Materials Science and Engineering, Jingdezhen Ceramic University, Jingdezhen 333403, China

\* Corresponding author: zhenyuanliu@just.edu.cn (Z.L.); renpengyuan@just.edu.cn (P.R.); iamjyang@just.edu.cn (J.Y.)

<sup>†</sup> These authors contributed equally to this paper.

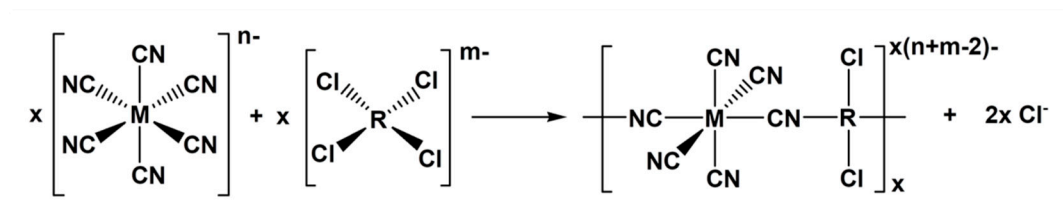

**Equation S1.** Formation equation of cyanogel from transition metal cyanometalates and tetrachlorometalates in aqueous solution.

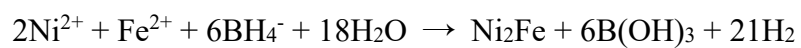

**Equation S2.** Equation of chemical reaction between cyanogel and  $\text{NaBH}_4$ .

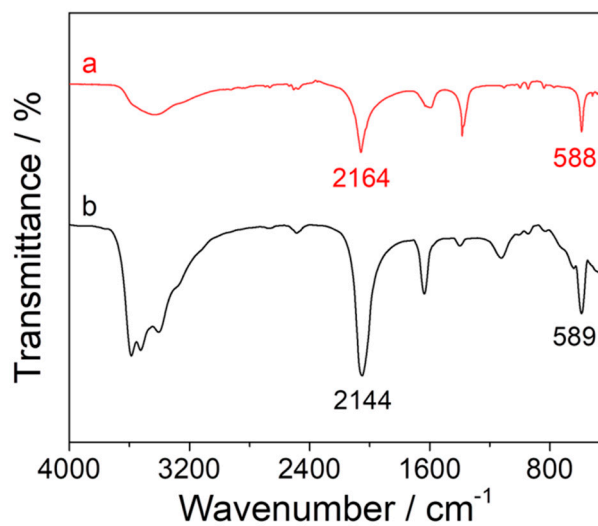

**Figure S1.** FT-IR spectra of (a) the NiCl<sub>2</sub>/Na<sub>4</sub>Fe(CN)<sub>6</sub> cyanogel and (b) pure Na<sub>4</sub>Fe(CN)<sub>6</sub>.

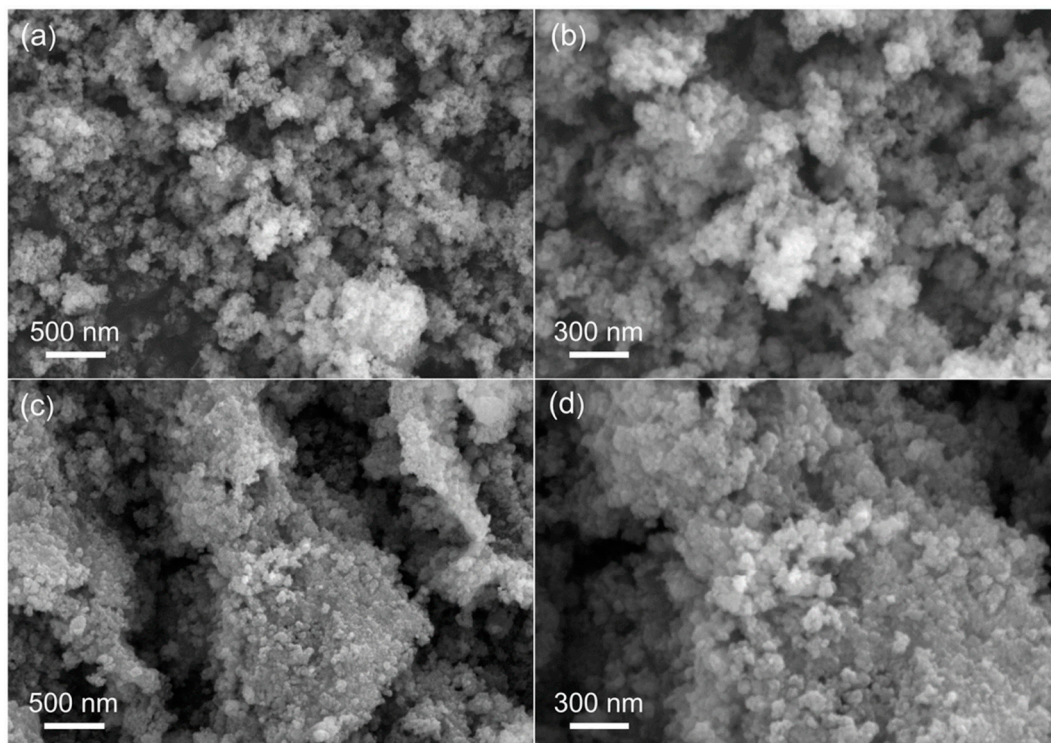

**Figure S2.** SEM images of (a-b) the NiFe-11 catalysts and (c-d) the NiFe-31 catalysts.

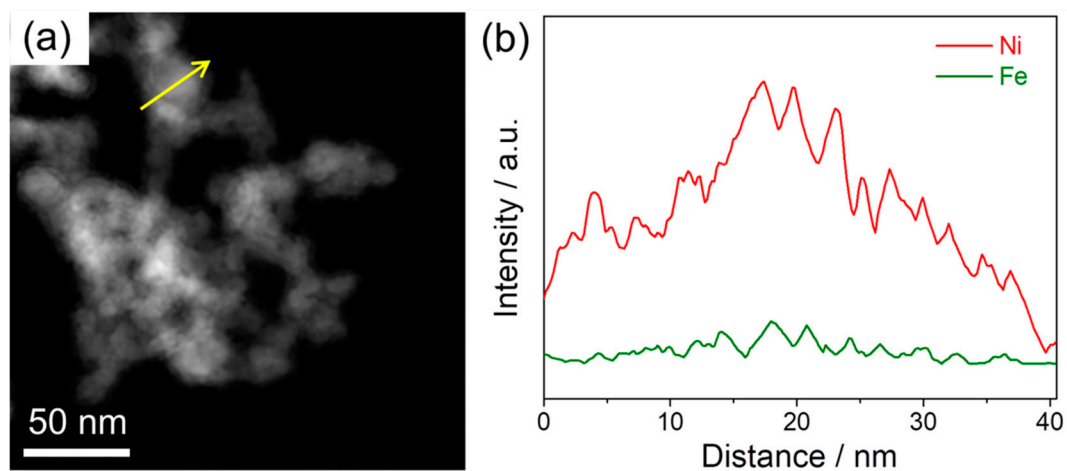

**Figure S3.** (a) STEM image and (b) EDX line scanning profile of the NiFe nanoaggregates.

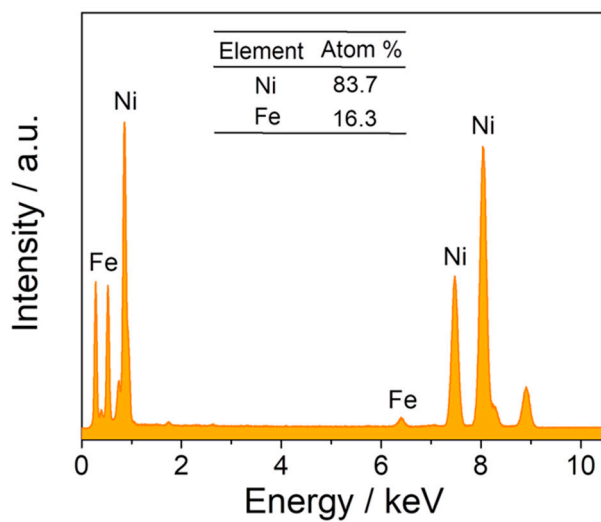

**Figure S4.** EDX spectrum of the NiFe-21 nanoaggregates.

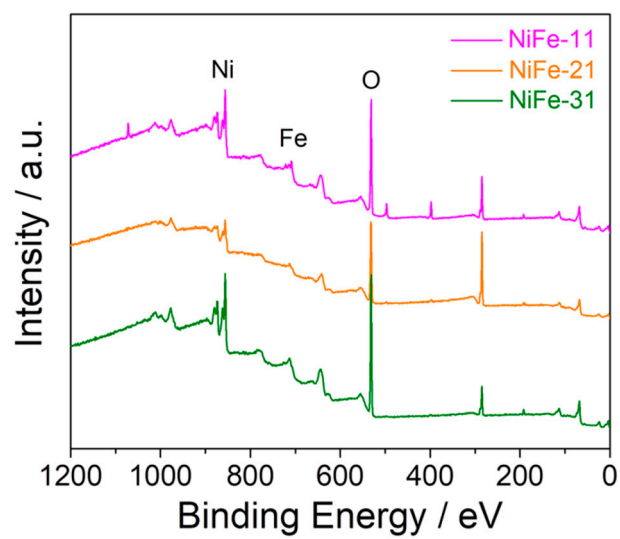

**Figure S5.** XPS survey scan spectra of the NiFe catalysts with different Ni/Fe molar ratio.

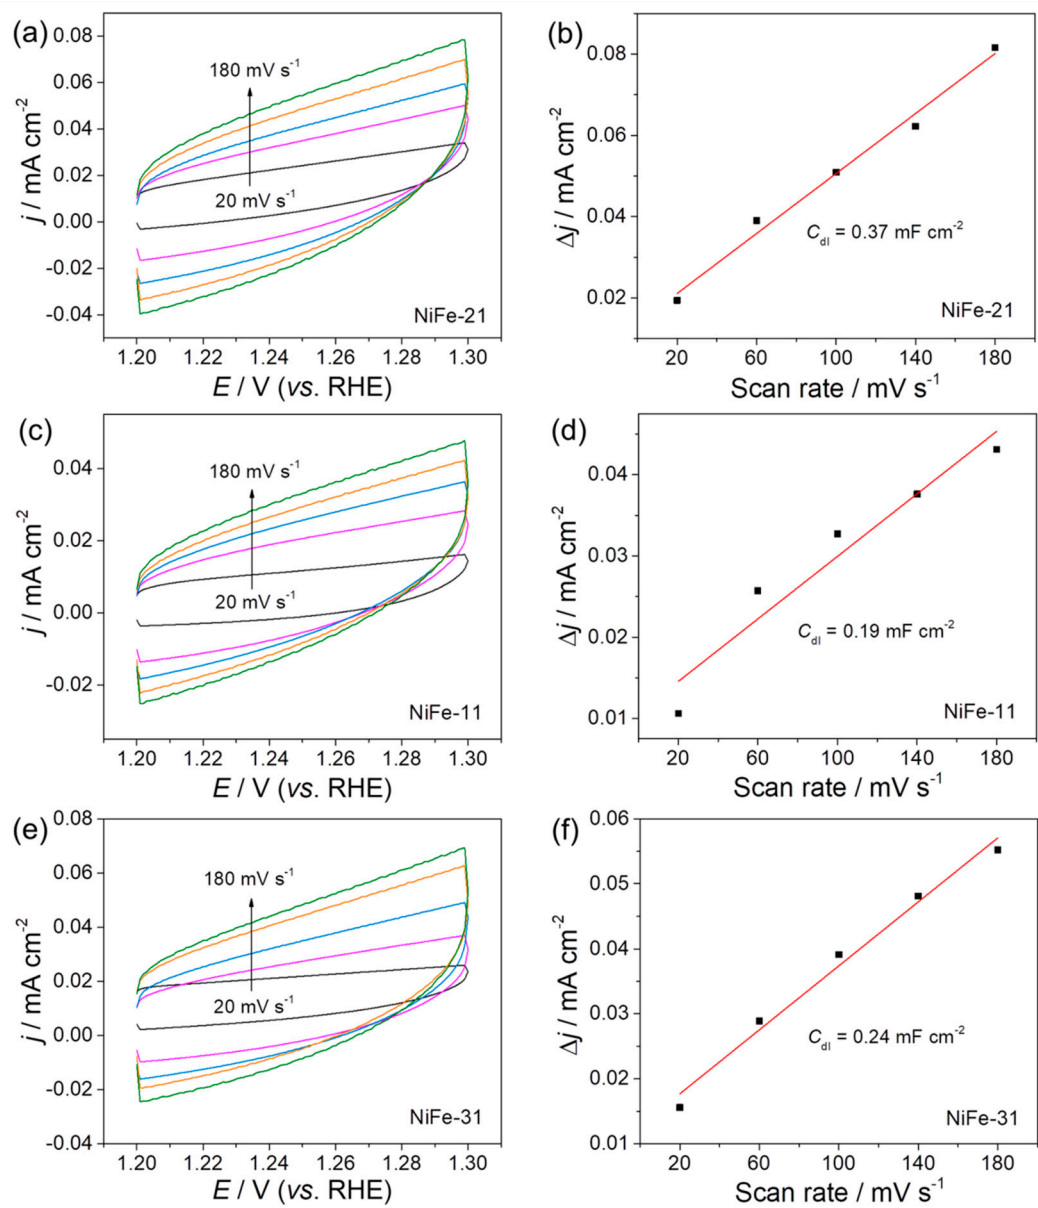

**Figure S6.** (a), (c) and (e) CV curves of NiFe-21, NiFe-11, NiFe-31 at different scan rates in 1 M KOH. (b), (d) and (f) Plots of the capacitive current density at 1.23 V against the scan rate of the NiFe-21, NiFe-11, NiFe-31.

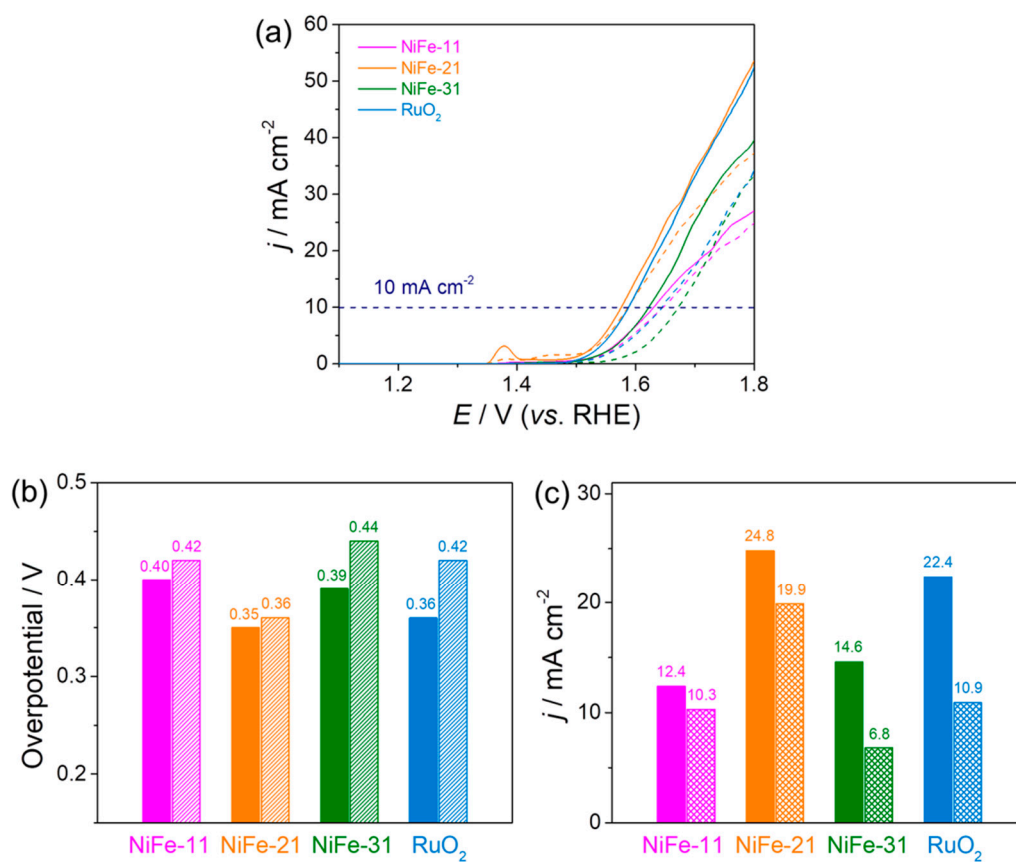

**Figure S7.** (a) OER polarization curves before and after 5000 cycles of the NiFe-21, NiFe-11, NiFe-31 and commercial RuO<sub>2</sub> catalysts. (b) Comparison of the overpotentials at the current density of 10 mA cm<sup>-2</sup> before and after 5000 cycles. (c) Comparison of the current density at the potential of 1.65 V before and after 5000 cycles.

**Table S1.** The atomic contents of Ni and Fe in the NiFe-11, NiFe-21 and NiFe-31 nanocatalysts obtained from the full XPS results.

| Catalyst | Ni / % | Fe / % |
|----------|--------|--------|
| NiFe-11  | 12.98  | 7.32   |
| NiFe-21  | 15.81  | 5.46   |
| NiFe-31  | 18.83  | 4.05   |

**Table S2.** Comparison of the OER activity of the amorphous NiFe-21 nanoaggregates in 1 M KOH electrolyte with other electrocatalysts previously reported.

| Catalyst                                         | Overpotential / V<br>(10 mA cm <sup>-2</sup> ) | Ref.      |
|--------------------------------------------------|------------------------------------------------|-----------|
| NiFe-21                                          | 0.35                                           | this work |
| NiFe-11                                          | 0.40                                           | this work |
| NiFe-31                                          | 0.39                                           | this work |
| NiCo-LDH                                         | 0.37                                           | [42]      |
| $\beta$ -Ni(OH) <sub>2</sub> plates              | 0.44                                           | [43]      |
| NiCo <sub>2</sub> S <sub>4</sub> /RGO            | 0.36                                           | [44]      |
| CoNi-LDH                                         | 0.37                                           | [45]      |
| NiCo <sub>2</sub> O <sub>4</sub> /CNT            | 0.39                                           | [46]      |
| Ni <sub>x</sub> Co <sub>3-x</sub> O <sub>4</sub> | 0.42                                           | [47]      |
| FeNC/Ni                                          | 0.39                                           | [48]      |
| Co <sub>3</sub> O <sub>4</sub> @NiFe-LDH         | 0.35                                           | [49]      |
| NiFeC LDH                                        | 0.36                                           | [50]      |
| RuO <sub>2</sub>                                 | 0.36                                           | this work |
